# Supplementary material for: How defensive medicine is defined in European medical literature: a systematic review
Source: HighWire-hosted journal article supplement (doi:10.1136/bmjopen-2021-057169), 2022-01-01
Supplement: bmjopen-2021-057169supp003_data_supplement.pdf [file bmjopen-2021-057169supp003_data_supplement.pdf]

## Supplementary Table 2. Quality assessment of studies

Listed after year of publication.

| <b>Studies analysed with Critical Appraisal Skills Programme (CASP)</b> |                                                             |                                              |                                                                             |                                                                          |                                                                       |                                                                                         |                                                       |                                                 |                                            |                                                    |
|-------------------------------------------------------------------------|-------------------------------------------------------------|----------------------------------------------|-----------------------------------------------------------------------------|--------------------------------------------------------------------------|-----------------------------------------------------------------------|-----------------------------------------------------------------------------------------|-------------------------------------------------------|-------------------------------------------------|--------------------------------------------|----------------------------------------------------|
| <b>Author, year, country</b>                                            | 1. Was there a clear statement of the aims of the research? | 2. Is a qualitative methodology appropriate? | 3. Was the research design appropriate to address the aims of the research? | 4. Was the recruitment strategy appropriate to the aims of the research? | 5. Was the data collected in a way that addressed the research issue? | 6. Has the relationship between researcher and participants been adequately considered? | 7. Have ethical issues been taken into consideration? | 8. Was the data analysis sufficiently rigorous? | 9. Is there a clear statement of findings? | 10. How valuable is the research (good/fair/poor)? |
| <b>Symon 2000, UK and Scotland*</b>                                     | Yes                                                         | Yes                                          | Yes                                                                         | N/A                                                                      | Yes                                                                   | N/A                                                                                     | Yes                                                   | N/A                                             | Yes                                        | Fair                                               |
| <b>Litchfield et al. 2014, UK</b>                                       | Yes                                                         | Yes                                          | Yes                                                                         | Yes                                                                      | Yes                                                                   | Yes                                                                                     | Yes                                                   | Yes                                             | Yes                                        | Good                                               |
| <b>Renkema et al. 2014, The Netherlands</b>                             | Yes                                                         | Yes                                          | Yes                                                                         | Yes                                                                      | Yes                                                                   | N/A                                                                                     | N/A                                                   | Yes                                             | Yes                                        | Good                                               |
| <b>Bourne et al. 2016, UK</b>                                           | Yes                                                         | Yes                                          | Yes                                                                         | Yes                                                                      | Yes                                                                   | N/A                                                                                     | Yes                                                   | Yes                                             | Yes                                        | Good                                               |
| <b>Assing Hvidt et al. 2017, Denmark</b>                                | Yes                                                         | Yes                                          | Yes                                                                         | Yes                                                                      | Yes                                                                   | N/A                                                                                     | Yes                                                   | Yes                                             | Yes                                        | Good                                               |
| <b>Assing Hvidt et al. 2019, Denmark</b>                                | Yes                                                         | Yes                                          | Yes                                                                         | Yes                                                                      | Yes                                                                   | Yes                                                                                     | Yes                                                   | Yes                                             | Yes                                        | Good                                               |
| <b>Müller et al. 2020, Germany</b>                                      | Yes                                                         | Yes                                          | Yes                                                                         | Yes                                                                      | Yes                                                                   | N/A                                                                                     | Yes                                                   | Yes                                             | Yes                                        | Fair                                               |
| <b>Young et al. 2020, UK</b>                                            | Yes                                                         | Yes                                          | Yes                                                                         | Yes                                                                      | Yes                                                                   | Yes                                                                                     | Yes                                                   | Yes                                             | Yes                                        | Good                                               |

| <b>Studies analysed with Cross Sectional Appraisal Tool (CSAT)</b> |                                                   |                                                        |                                                      |                                                          |                                                                        |                                                                           |                                                                                |                                                 |                                            |                                                         |                                                     |
|--------------------------------------------------------------------|---------------------------------------------------|--------------------------------------------------------|------------------------------------------------------|----------------------------------------------------------|------------------------------------------------------------------------|---------------------------------------------------------------------------|--------------------------------------------------------------------------------|-------------------------------------------------|--------------------------------------------|---------------------------------------------------------|-----------------------------------------------------|
| <b>Author, year, country</b>                                       | 1. Did the study address a clearly focused issue? | 2. Did the authors use an appropriate method to answer | 3. Were the subjects recruited in an acceptable way? | 4. Were the measures accurately measured to reduce bias? | 5. Were the data collected in a way that addressed the research issue? | 6. Did the study have enough participants to minimize the play of chance? | 7. How are the results presented and what is the main result? (good/fair/poor) | 8. Was the data analysis sufficiently rigorous? | 9. Is there a clear statement of findings? | 10. Can the results be applied to the local population? | 11. How valuable is the research? (good/fair/poor)? |

|                                                        |     | their question? |     |     |     |     |      |     |     |     |      |
|--------------------------------------------------------|-----|-----------------|-----|-----|-----|-----|------|-----|-----|-----|------|
| <b>Summerton 1995, UK</b>                              | Yes | Yes             | Yes | N/A | Yes | Yes | Good | Yes | Yes | Yes | Good |
| <b>Van Boven et al. 1997, The Netherlands</b>          | Yes | Yes             | N/A | Yes | Yes | No  | Fair | Yes | Yes | N/A | Fair |
| <b>Lindenthal et al. 1999, The Netherlands and USA</b> | Yes | Yes             | Yes | Yes | Yes | Yes | Fair | Yes | Yes | Yes | Fair |
| <b>Summerton 2000, UK</b>                              | Yes | Yes             | Yes | N/A | Yes | Yes | Fair | Yes | Yes | Yes | Good |
| <b>Symon 2000, UK and Scotland†</b>                    | Yes | Yes             | Yes | Yes | Yes | Yes | Fair | N/A | Yes | Yes | Fair |
| <b>Vimercati et al. 2000, Italy</b>                    | Yes | Yes             | Yes | N/A | Yes | Yes | Good | Yes | Yes | Yes | Good |
| <b>Passmore et al. 2002, England</b>                   | Yes | Yes             | Yes | Yes | Yes | Yes | Fair | N/A | Yes | Yes | Fair |
| <b>Brilla et al. 2006, Germany and USA</b>             | Yes | Yes             | Yes | Yes | Yes | Yes | Good | Yes | Yes | Yes | Good |
| <b>Catino et al. 2009, Italy</b>                       | Yes | Yes             | Yes | N/A | Yes | Yes | Good | N/A | Yes | Yes | Fair |
| <b>Steurer et al. 2009, Switzerland</b>                | Yes | Yes             | N/A | N/A | N/A | Yes | Poor | Yes | Yes | Yes | Good |
| <b>Feess 2012, Germany‡</b>                            | -   | -               | -   | -   | -   | -   | -    | -   | -   | -   | -    |
| <b>Rohacek et al. 2012, Switzerland</b>                | Yes | Yes             | Yes | Yes | Yes | Yes | Good | Yes | Yes | Yes | Good |
| <b>Elli et al. 2013, Italy</b>                         | Yes | Yes             | No  | N/A | Yes | Yes | Fair | No  | Yes | Yes | Poor |
| <b>Ortashi et al. 2013, UK</b>                         | Yes | Yes             | No  | Yes | Yes | Yes | Good | Yes | Yes | Yes | Fair |
| <b>Domingues et al. 2014, Portugal</b>                 | Yes | Yes             | Yes | Yes | Yes | Yes | Fair | Yes | Yes | Yes | Fair |
| <b>Garcia-Retamero et al. 2014, Spain</b>              | Yes | Yes             | Yes | Yes | Yes | Yes | Good | Yes | Yes | Yes | Good |
| <b>Solaroglu et al. 2014, Turkey</b>                   | Yes | Yes             | Yes | Yes | Yes | Yes | Good | N/A | Yes | Yes | Good |
| <b>Bourne et al. 2015, UK</b>                          | Yes | Yes             | Yes | Yes | Yes | Yes | Good | Yes | Yes | Yes | Good |

|                                               |     |     |     |     |     |     |      |     |     |     |      |
|-----------------------------------------------|-----|-----|-----|-----|-----|-----|------|-----|-----|-----|------|
| <b>Motta et al. 2015, Italy</b>               | Yes | Yes | Yes | Yes | Yes | Yes | Good | Yes | Yes | Yes | Good |
| <b>Osti et al. 2015, Austria</b>              | Yes | Yes | Yes | Yes | Yes | Yes | Good | Yes | Yes | Yes | Good |
| <b>Ramella et al. 2015, Italy</b>             | Yes | Yes | Yes | Yes | Yes | Yes | Good | Yes | Yes | Yes | Good |
| <b>Tanriverdi et al. 2015, Turkey</b>         | Yes | Yes | Yes | Yes | Yes | Yes | Good | Yes | Yes | Yes | Good |
| <b>Antoci et al. 2016, Italy†</b>             | -   | -   | -   | -   | -   | -   | -    | -   | -   | -   | -    |
| <b>Panella et al. 2016, Italy</b>             | Yes | Yes | Yes | Yes | Yes | Yes | Good | Yes | Yes | Yes | Good |
| <b>Bourne et al. 2017, UK</b>                 | Yes | Yes | Yes | Yes | Yes | Yes | Good | Yes | Yes | Yes | Good |
| <b>Olcay et al. 2017, Turkey</b>              | Yes | Yes | No  | Yes | Yes | Yes | Good | Yes | No  | No  | Fair |
| <b>Panella et al. 2017, Italy</b>             | Yes | Yes | Yes | Yes | Yes | Yes | Good | Yes | Yes | Yes | Good |
| <b>Vandersteegen et al. 2017, Belgium</b>     | Yes | Yes | Yes | Yes | Yes | Yes | Fair | Yes | Yes | Yes | Good |
| <b>Yan et al. 2017, The Netherlands</b>       | Yes | Yes | No  | Yes | Yes | No  | Good | Yes | Yes | No  | Fair |
| <b>Kucuk 2018, Turkey</b>                     | Yes | Yes | Yes | Yes | No  | Yes | Good | N/A | Yes | Yes | Good |
| <b>Mira et al. 2018, Spain</b>                | Yes | Yes | Yes | Yes | Yes | Yes | Good | Yes | Yes | Yes | Good |
| <b>Tebano et al. 2018, 74 countries</b>       | Yes | Yes | Yes | N/A | Yes | Yes | Good | Yes | Yes | Yes | Fair |
| <b>Bourne et al. 2019, UK</b>                 | Yes | Yes | Yes | Yes | Yes | Yes | Good | Yes | Yes | Yes | Good |
| <b>Laarman et al. 2019, The Netherlands</b>   | Yes | Yes | Yes | Yes | Yes | Yes | Good | Yes | Yes | Yes | Good |
| <b>Aranaz Andrés et al. 2020, Spain</b>       | Yes | Yes | Yes | Yes | Yes | Yes | Good | Yes | Yes | Yes | Good |
| <b>Calikoglu et al. 2020, Turkey</b>          | Yes | Yes | Yes | Yes | Yes | Yes | Good | Yes | Yes | Yes | Good |
| <b>Ferorelli et al. 2020, Italy</b>           | Yes | Yes | Yes | Yes | Yes | Yes | Fair | Yes | Yes | Yes | Good |
| <b>Gadjradj et al. 2020, Europe and other</b> | Yes | Yes | Yes | Yes | Yes | Yes | Good | Yes | Yes | Yes | Good |

|                                             |     |     |     |     |     |     |      |     |     |     |      |
|---------------------------------------------|-----|-----|-----|-----|-----|-----|------|-----|-----|-----|------|
| <b>Osorio et al. 2020, Spain</b>            | Yes | Yes | Yes | Yes | Yes | No  | Fair | Yes | Yes | Yes | Fair |
| <b>Pausch et al. 2020, Germany</b>          | Yes | Yes | Yes | Yes | Yes | Yes | Good | Yes | Yes | Yes | Good |
| <b>Vargas-Blasco et al. 2020, Spain</b>     | Yes | Yes | N/A | N/A | Yes | Yes | Good | N/A | Yes | Yes | Fair |
| <b>Vizcaíno-Rakosnik et al. 2020, Spain</b> | Yes | Yes | Yes | No  | Yes | Yes | Good | Yes | Yes | Yes | Good |

N/A: not available

\*Symon 2000, UK and Scotland, Litigation and changes in professional behaviour: a qualitative appraisal

†Symon 2000, UK and Scotland, Litigation and defensive clinical practice: quantifying the problem

‡CASP or CSAT are non-applicable
